# Supplementary material
Source: PubMed Central journal article supplement (PMC8089101)
Supplement: 41422_2020_424_MOESM1_ESM.pdf [file 41422_2020_424_MOESM1_ESM.pdf]

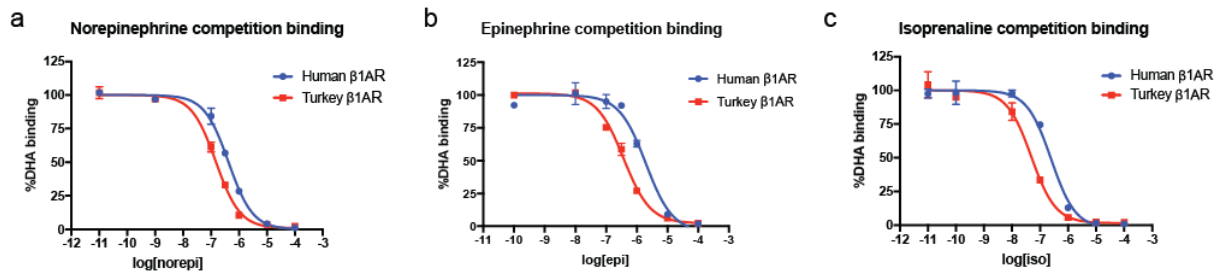

**Supplementary information, Fig. S1| The human  $\beta_1$ AR and the turkey  $\beta_1$ AR have different affinities to ligands.**

a, Norepinephrine competition curves of the human  $\beta_1$ AR and the turkey  $\beta_1$ AR. b, Epinephrine competition curves of the human  $\beta_1$ AR and the turkey  $\beta_1$ AR. c, Isoprenaline competition curves of the human  $\beta_1$ AR and the turkey  $\beta_1$ AR. Data are given as mean  $\pm$  SEM of 3 independent samples.
