# Supplementary material
Source: PubMed Central journal article supplement (PMC8089101)
Supplement: 41422_2020_424_MOESM2_ESM.pdf [file 41422_2020_424_MOESM2_ESM.pdf]

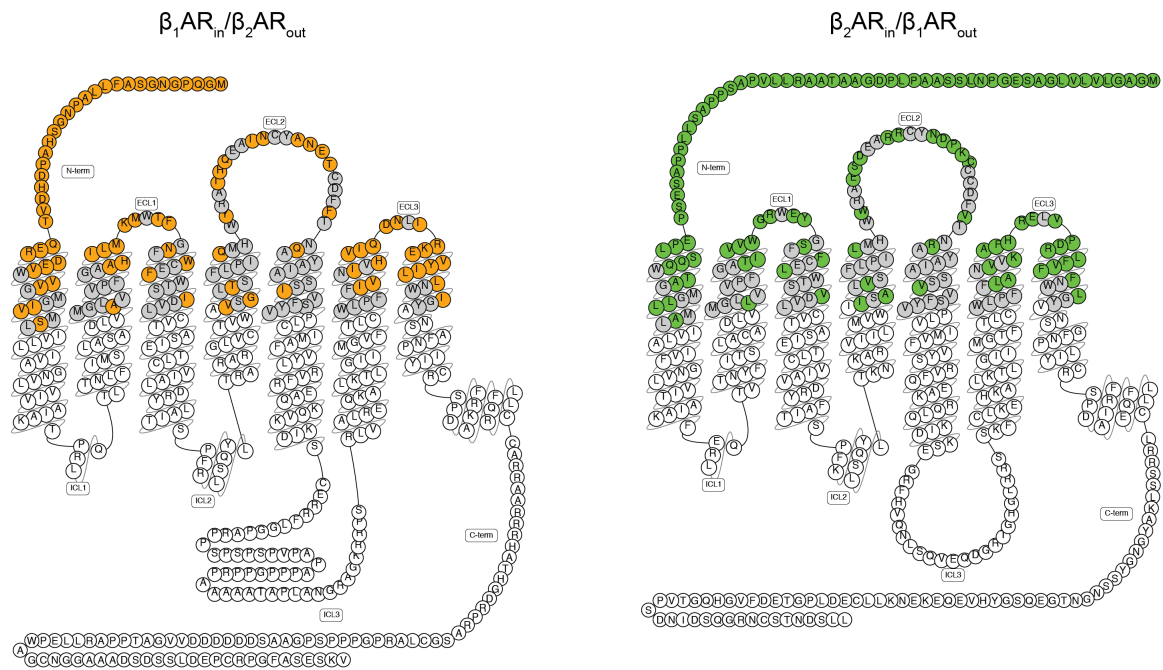

**Supplementary information, Fig. S2| The sequence information of the  $\beta_1\text{AR}_{in}/\beta_2\text{AR}_{out}$  and  $\beta_2\text{AR}_{in}/\beta_1\text{AR}_{out}$  chimera receptors.**

The  $\beta_1\text{AR}_{in}/\beta_2\text{AR}_{out}$  construct was generated by replacing the N-terminus of the  $\beta_1\text{AR}$  to that of the  $\beta_2\text{AR}$  (the first residue to W<sup>1.31</sup>) plus mutating 55 residues between W<sup>1.31</sup> to the C-terminus of the  $\beta_1\text{AR}$  to those of the  $\beta_2\text{AR}$ . The mutated residues are labeled in orange. The  $\beta_2\text{AR}_{in}/\beta_1\text{AR}_{out}$  construct was generated in a similar way and the mutated residues are labeled in green.
