# Supplementary material
Source: PubMed Central journal article supplement (PMC8089101)
Supplement: 41422_2020_424_MOESM3_ESM.pdf [file 41422_2020_424_MOESM3_ESM.pdf]

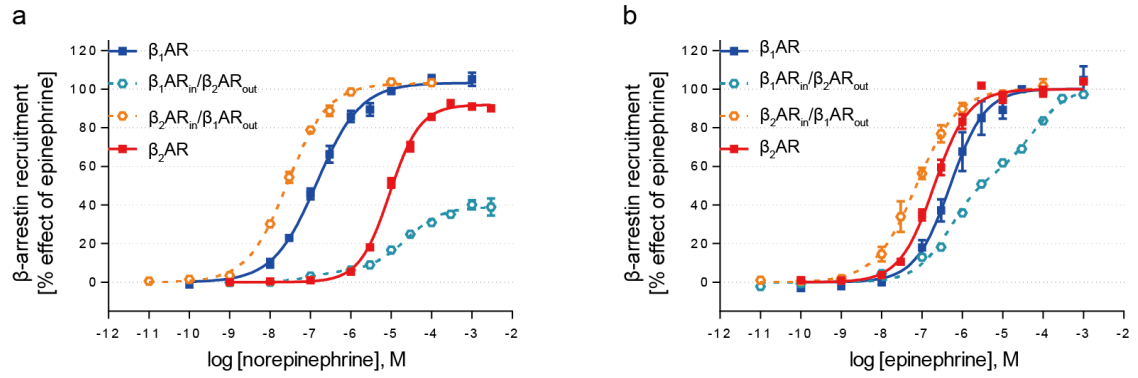

**Supplementary information, Fig. S3 |  $\beta_1$ AR,  $\beta_2$ AR and  $\beta_1$ AR<sub>in</sub>/ $\beta_2$ AR<sub>out</sub>,  $\beta_2$ AR<sub>in</sub>/ $\beta_1$ AR<sub>out</sub> chimeras.**

a, norepinephrine stimulated responses; b, epinephrine stimulated responses.
