# Supplementary material
Source: PubMed Central journal article supplement (PMC8089101)
Supplement: 41422_2020_424_MOESM5_ESM.pdf [file 41422_2020_424_MOESM5_ESM.pdf]

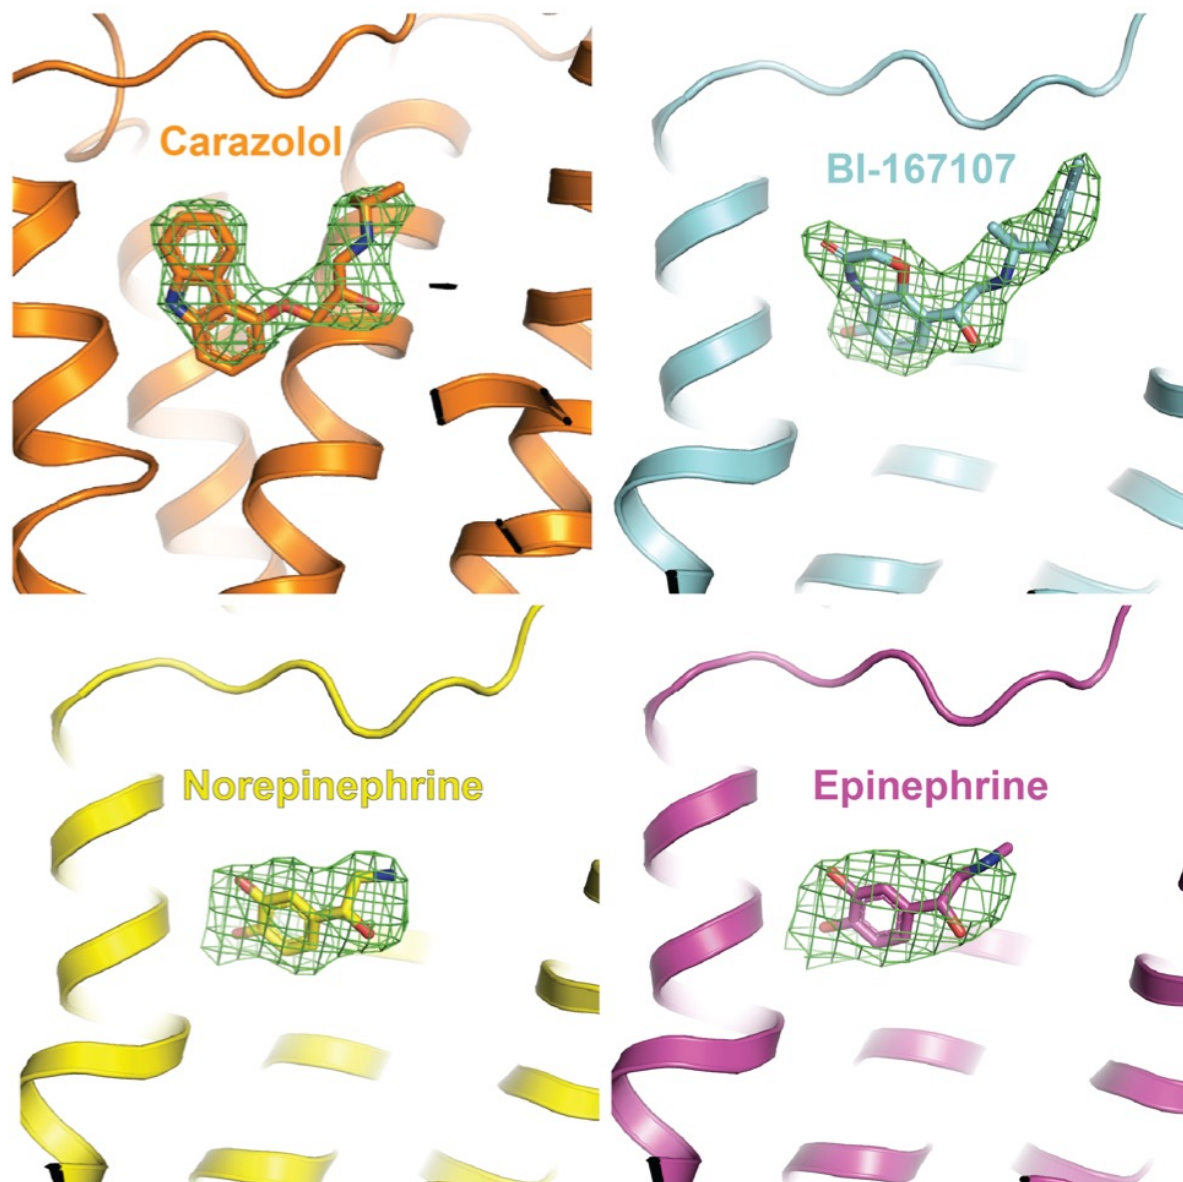

**Supplementary information, Fig. S5| Electron Densities of ligands**

The ligand binding sites for carazolol, BI-167107, norepinephrine and epinephrine are revealed by  $F_o - F_c$  simulated annealing omit maps, contoured at  $2.5 \sigma$  (green)
