# Supplementary material
Source: PubMed Central journal article supplement (PMC8089101)
Supplement: 41422_2020_424_MOESM8_ESM.pdf [file 41422_2020_424_MOESM8_ESM.pdf]

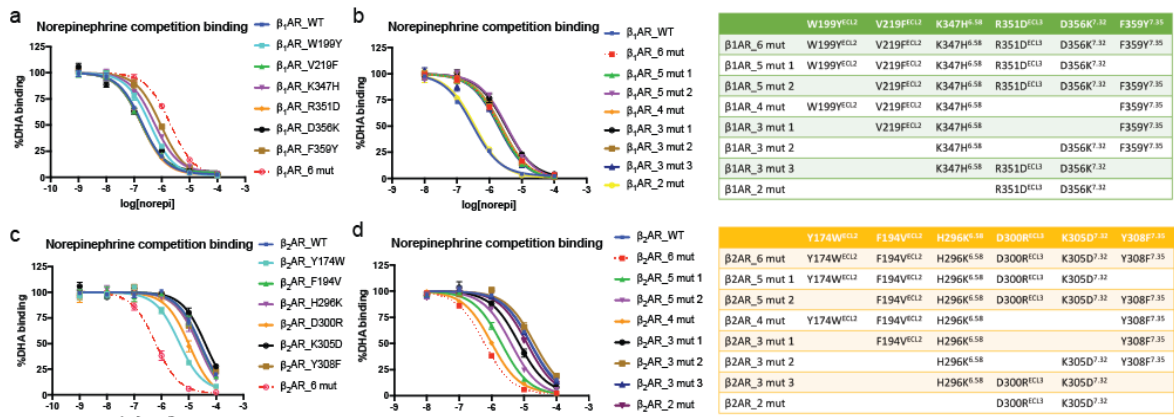

**Supplementary information, Fig. S8| Norepinephrine competition curves of the human  $\beta_1$ AR and  $\beta_2$ AR mutations.**

a, The norepinephrine competition curves of single mutations of the  $\beta_1$ AR. b, The norepinephrine competition curves of multiple mutations (containing 2 – 6 mutations) of the  $\beta_1$ AR. c, The norepinephrine competition curves of single mutations of the  $\beta_2$ AR. d, The norepinephrine competition curves of multiple mutations (containing 2 – 6 mutations) of the  $\beta_2$ AR. Data are given as mean  $\pm$  SEM of 3 – 12 independent samples. The concentration of [<sup>3</sup>H]-DHA used for competition binding is 2 nM. The  $\beta_2$ AR-Y174W and  $\beta_2$ AR-D300R single mutations showed increased norepinephrine affinity compared to wild type  $\beta_2$ AR, however, the corresponding mutations in the  $\beta_1$ AR only show small ( $\beta_1$ AR-W199Y) or no ( $\beta_1$ AR-R351D) decreases on norepinephrine affinity. While the  $\beta_1$ AR-K347H and  $\beta_1$ AR-F359Y showed decreased norepinephrine affinity compared to the wild type  $\beta_1$ AR; the corresponding mutations ( $\beta_2$ AR-H296K or  $\beta_2$ AR-Y308F) did not show any increase in norepinephrine affinity. Furthermore, although the  $\beta_1$ AR-F359Y showed the largest decrease on norepinephrine affinity among the 6 single mutations of the  $\beta_1$ AR a, a triple mutant ( $\beta_1$ AR-3mut-3) without the F359Y mutation showed a comparable effect in decreasing norepinephrine affinity as the  $\beta_1$ AR-6mut b, The complex behaviors of the mutants suggest that norepinephrine selectivity is determined by a combination of residues that cooperate to form the ligand binding pathway.
