# Supplementary material
Source: PubMed Central journal article supplement (PMC8089101)
Supplement: 41422_2020_424_MOESM9_ESM.pdf [file 41422_2020_424_MOESM9_ESM.pdf]

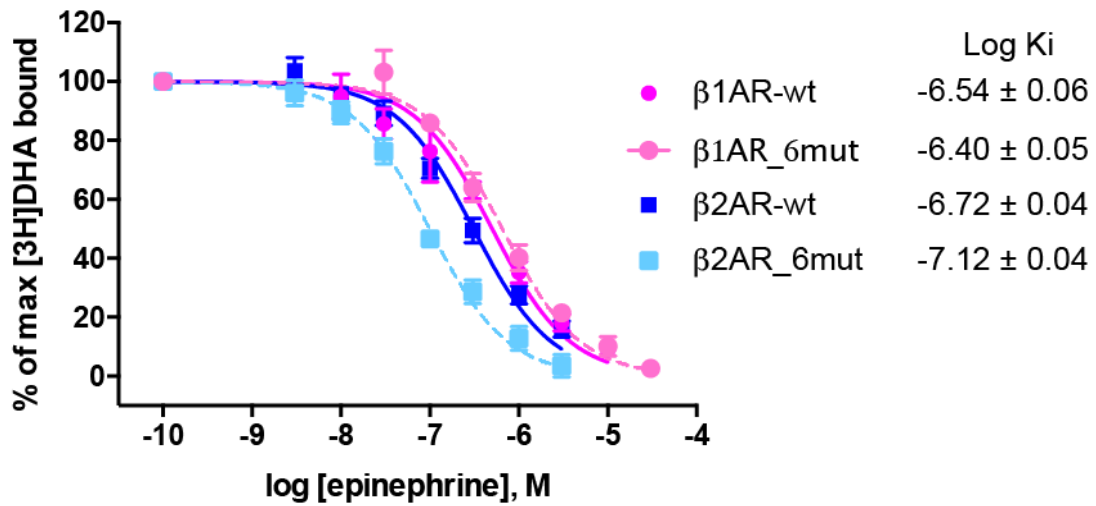

Supplementary information, Fig. S9| Epinephrine competition curves of the  $\beta_1$ AR,  $\beta_2$ AR and  $\beta_1$ AR\_6mut,  $\beta_2$ AR\_6mut mutations.

The  $\beta_1$ AR\_6mut has similar epinephrine affinity as the  $\beta_1$ AR. While the  $\beta_2$ AR\_6mut has a slightly (< 3-fold) increased epinephrine affinity compared to the  $\beta_2$ AR. Data are given as mean  $\pm$  SEM from 3 independent experiments performed in duplicate. The concentrations of [ $^3$ H]-DHA for competition binding are varied from 0.15 to 0.9 nM based on the  $K_d$  for the distinct constructs.
