# Supplementary material
Source: PubMed Central journal article supplement (PMC8089101)
Supplement: 41422_2020_424_MOESM10_ESM.pdf [file 41422_2020_424_MOESM10_ESM.pdf]

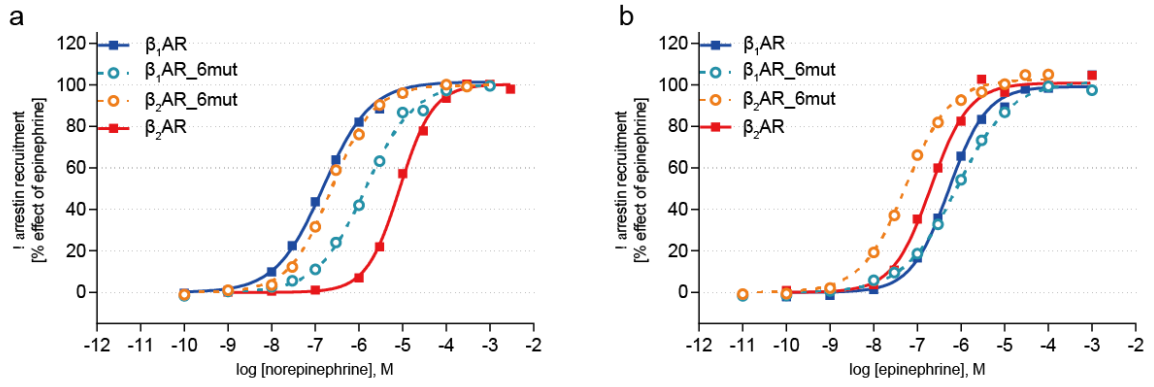

**Supplementary information, Fig. S10|  $\beta$ -arrestin recruitment assay of  $\beta_1$ AR,  $\beta_2$ AR and  $\beta_1$ AR\_6mut,  $\beta_2$ AR\_6mut.**

a, norepinephrine stimulated responses; b, epinephrine stimulated responses. Data are given as mean  $\pm$  SEM of 6-11 independent experiments.
