# Supplementary material
Source: PubMed Central journal article supplement (PMC8089101)
Supplement: 41422_2020_424_MOESM11_ESM.pdf [file 41422_2020_424_MOESM11_ESM.pdf]

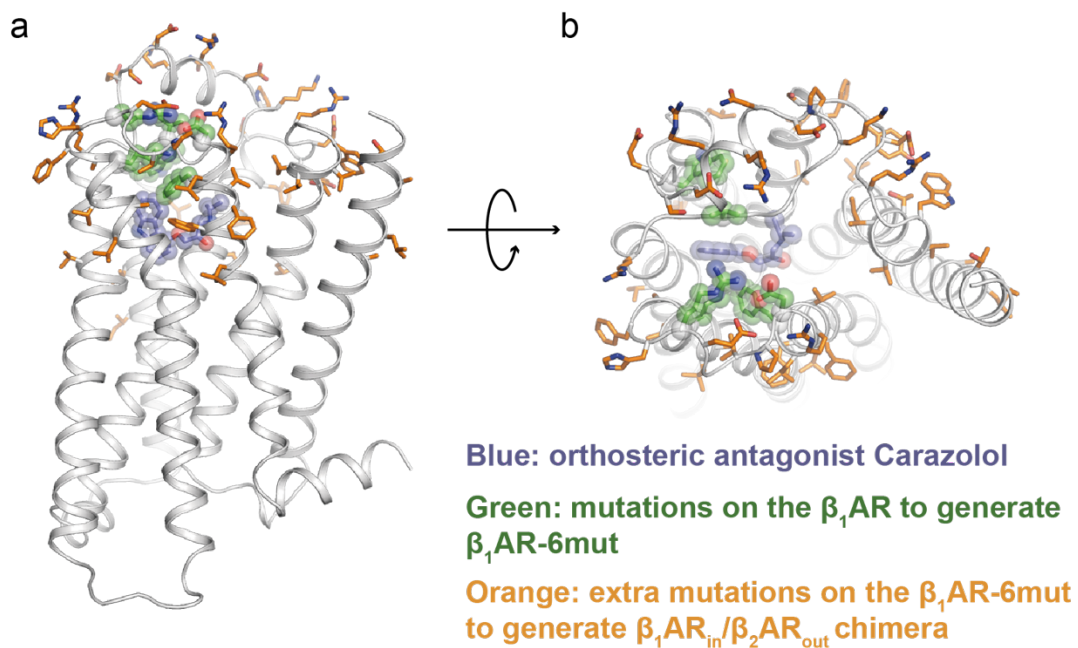

**Supplementary information, Fig. S11| Comparison of the mutations introduced in  $\beta_1$ AR\_6mut construct with those in the  $\beta_1$ AR<sub>in</sub>/ $\beta_2$ AR<sub>out</sub> chimera.**

a, Side view of the  $\beta_1$ AR-carazolol structure. The 6 mutations introduced in the  $\beta_1$ AR\_6mut are shown as green sticks and spheres. The other mutations introduced in the  $\beta_1$ AR<sub>in</sub>/ $\beta_2$ AR<sub>out</sub> chimera are shown as orange sticks. b, Top view of the  $\beta_1$ AR-carazolol structure.
