# Supplementary material
Source: PubMed Central journal article supplement (PMC8089101)
Supplement: 41422_2020_424_MOESM12_ESM.pdf [file 41422_2020_424_MOESM12_ESM.pdf]

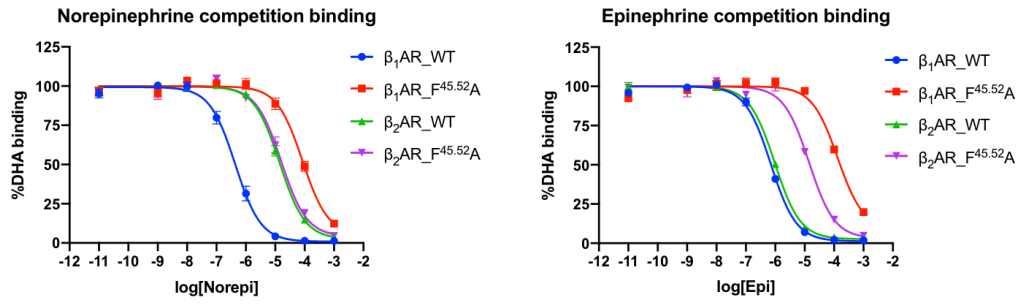

|                                   | DHA Kd (nM) | Norepinephrine IC50 (M) | Norepinephrine Log Ki | Norepinephrine Ki (M) | Epinephrine IC50 (M) | Epinephrine Log Ki | Epinephrine Ki (M) |
|-----------------------------------|-------------|-------------------------|-----------------------|-----------------------|----------------------|--------------------|--------------------|
| $\beta_1$ AR_WT                   | 4.41        | 4.36e-007               | -6.52±0.11            | 3.00e-007             | 7.02e-007            | -6.32±0.06         | 4.83e-007          |
| $\beta_1$ AR_F <sup>45.52</sup> A | 29.62       | 8.44e-005               | -4.10±0.14            | 7.90e-005             | 1.32e-004            | -3.91±0.12         | 1.24e-004          |
| $\beta_2$ AR_WT                   | 0.72        | 1.40e-005               | -5.43±0.09            | 3.69e-006             | 9.58e-007            | -6.60±0.06         | 2.53e-007          |
| $\beta_2$ AR_F <sup>45.52</sup> A | 8.53        | 1.61e-005               | -4.89±0.13            | 1.30e-005             | 1.41e-005            | -4.94±0.09         | 1.14e-005          |

**Supplementary information, Fig. S12| Epinephrine and norepinephrine competition curves of the wild type and F<sup>45.52</sup>A mutation of  $\beta_1$ AR and  $\beta_2$ AR.**

Data are given as mean±SEM of 3 independent experiments.
