# Supplementary material
Source: PubMed Central journal article supplement (PMC8089101)
Supplement: 41422_2020_424_MOESM14_ESM.pdf [file 41422_2020_424_MOESM14_ESM.pdf]

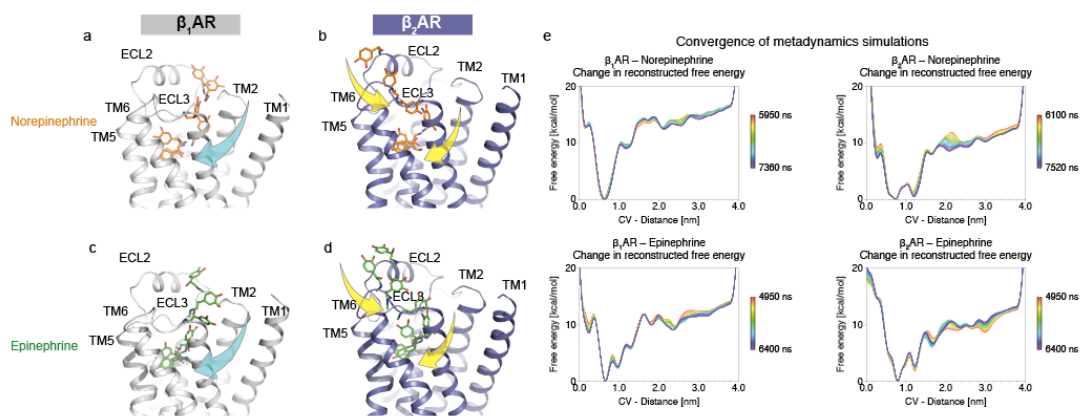

**Supplementary information, Fig. S14| Similar to norepinephrine, epinephrine also takes a different binding pathway in the  $\beta_1$ AR and  $\beta_2$ AR.**

a, The norepinephrine (orange sticks) binding pathway to the  $\beta_1$ AR revealed by metadynamics simulations. b, The norepinephrine (orange sticks) binding pathway to the  $\beta_2$ AR revealed by metadynamics simulations. c, The epinephrine (green sticks) binding pathway to the  $\beta_1$ AR revealed by metadynamics simulations. d, The epinephrine (green sticks) binding pathway to the  $\beta_2$ AR revealed by metadynamics simulations. e, Convergence of the metadynamics simulations sampling binding pathways for norepinephrine and epinephrine at  $\beta_1$ AR and  $\beta_2$ AR. The convergence of metadynamics simulations shown for the sampling of the distance between the core of the receptor (center of mass of V117<sup>3,36</sup> and W286<sup>6,48</sup>) and ligand (center of mass of ligand atoms). Convergence is demonstrated by a small change in the free energy surface between different intervals of sampling time.
