# Supplementary material
Source: PubMed Central journal article supplement (PMC8089101)
Supplement: 41422_2020_424_MOESM15_ESM.pdf [file 41422_2020_424_MOESM15_ESM.pdf]

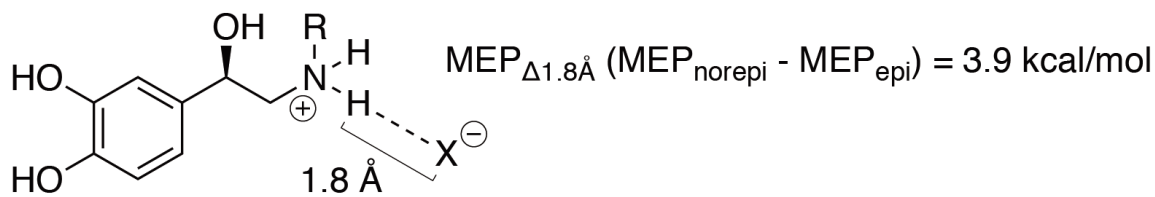

R = H (norepinephrine), CH<sub>3</sub> (epinephrine)

**Supplementary information, Fig. S15| Epinephrine has weaker interaction with negatively charged oxygen of Asp<sup>3.32</sup> than norepinephrine due to the charge difference.**

Due to the addition of the methyl group, the molecular electrostatic potential (MEP) of epinephrine is 3.9 kcal/mol weaker compared to norepinephrine along the N-H axis at 1.8 Å, which is the distance observed for the interaction between the N-H hydrogen of the ligands and the negatively charged oxygen of Asp<sup>3.32</sup> in crystal structures of β<sub>1</sub>AR and β<sub>2</sub>AR.
