# Supplementary material
Source: PubMed Central journal article supplement (PMC8089101)
Supplement: 41422_2020_424_MOESM16_ESM.pdf [file 41422_2020_424_MOESM16_ESM.pdf]

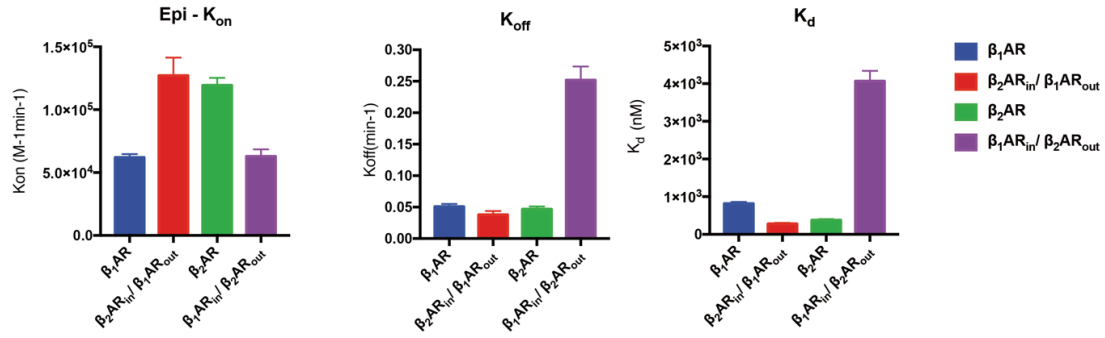

**Supplementary information, Fig. S16| Binding kinetics studies suggest epinephrine does not have preference over the  $\beta_1$ AR or the  $\beta_2$ AR.**

The  $K_{on}$ ,  $K_{off}$  and  $K_i$  of epinephrine binding to the human  $\beta_1$ AR,  $\beta_2$ AR, as well as the  $\beta_1$ AR<sub>in</sub>/ $\beta_2$ AR<sub>out</sub>,  $\beta_2$ AR<sub>in</sub>/ $\beta_1$ AR<sub>out</sub> chimeras were measured. Data are given as mean  $\pm$  SEM of 4–7 independent experiments.
