# Supplementary material
Source: PubMed Central journal article supplement (PMC8089101)
Supplement: 41422_2020_424_MOESM17_ESM.pdf [file 41422_2020_424_MOESM17_ESM.pdf]

**a**

| <b>Norepinephrine</b>                                    | <b>K<sub>on</sub> (M<sup>-1</sup>min<sup>-1</sup>)</b> | <b>n</b> | <b>K<sub>off</sub> (min<sup>-1</sup>)</b> | <b>n</b> | <b>K<sub>off</sub>/K<sub>on</sub> (nM)</b> | <b>n</b> |
|----------------------------------------------------------|--------------------------------------------------------|----------|-------------------------------------------|----------|--------------------------------------------|----------|
| $\beta_1$ AR                                             | $2.0 \pm 0.15 \times 10^5$                             | 7        | $6.4 \pm 1.2 \times 10^{-2}$              | 7        | $3.1 \pm 0.5 \times 10^2$                  | 7        |
| $\beta_2$ AR                                             | $8.5 \pm 1.5 \times 10^3$                              | 4        | $4.1 \pm 1.2 \times 10^{-2}$              | 4        | $4.7 \pm 0.6 \times 10^3$                  | 4        |
| $\beta_1$ AR <sub>in</sub> / $\beta_2$ AR <sub>out</sub> | $6.7 \pm 0.8 \times 10^3$                              | 3        | $1.0 \pm 0.1 \times 10^{-1}$              | 3        | $1.4 \pm 0.2 \times 10^4$                  | 3        |
| $\beta_2$ AR <sub>in</sub> / $\beta_1$ AR <sub>out</sub> | $4.9 \pm 1.3 \times 10^5$                              | 8        | $9.4 \pm 2.1 \times 10^{-2}$              | 8        | $2.5 \pm 0.5 \times 10^2$                  | 8        |
| $\beta_1$ AR_6mut                                        | $3.0 \pm 0.8 \times 10^4$                              | 3        | $2.4 \pm 0.6 \times 10^{-2}$              | 3        | $8.1 \pm 0.3 \times 10^2$                  | 3        |
| $\beta_2$ AR_6mut                                        | $1.4 \pm 0.3 \times 10^5$                              | 4        | $6.1 \pm 1.4 \times 10^{-2}$              | 4        | $4.6 \pm 0.7 \times 10^2$                  | 4        |

**b**

| <b>Epinephrine</b>                                       | <b>K<sub>on</sub> (M<sup>-1</sup>min<sup>-1</sup>)</b> | <b>n</b> | <b>K<sub>off</sub> (min<sup>-1</sup>)</b> | <b>n</b> | <b>K<sub>off</sub>/K<sub>on</sub> (nM)</b> | <b>n</b> |
|----------------------------------------------------------|--------------------------------------------------------|----------|-------------------------------------------|----------|--------------------------------------------|----------|
| $\beta_1$ AR                                             | $6.2 \pm 0.6 \times 10^4$                              | 5        | $5.1 \pm 0.9 \times 10^{-2}$              | 5        | $8.2 \pm 1 \times 10^2$                    | 5        |
| $\beta_2$ AR                                             | $1.2 \pm 0.2 \times 10^5$                              | 7        | $4.7 \pm 1.1 \times 10^{-2}$              | 7        | $3.8 \pm 0.6 \times 10^2$                  | 7        |
| $\beta_1$ AR <sub>in</sub> / $\beta_2$ AR <sub>out</sub> | $6.3 \pm 1.1 \times 10^4$                              | 4        | $2.5 \pm 0.4 \times 10^{-1}$              | 4        | $4.1 \pm 0.5 \times 10^3$                  | 4        |
| $\beta_2$ AR <sub>in</sub> / $\beta_1$ AR <sub>out</sub> | $1.3 \pm 0.3 \times 10^5$                              | 4        | $3.8 \pm 1.2 \times 10^{-2}$              | 4        | $2.8 \pm 0.5 \times 10^2$                  | 4        |

**Supplementary information, Table. S1| The binding kinetics of catecholamines to the  $\beta_1$ AR, the  $\beta_2$ AR, the chimeric  $\beta_1$ AR<sub>in</sub>/ $\beta_1$ AR<sub>out</sub>,  $\beta_1$ AR<sub>in</sub>/ $\beta_1$ AR<sub>out</sub> receptors and the  $\beta_1$ AR\_6mut,  $\beta_2$ AR\_6mut mutants.**

a. The association rate, dissociation rate and K<sub>d</sub> values of norepinephrine to the  $\beta_1$ AR, the  $\beta_2$ AR, the chimeric  $\beta_1$ AR<sub>in</sub>/ $\beta_1$ AR<sub>out</sub>,  $\beta_1$ AR<sub>in</sub>/ $\beta_1$ AR<sub>out</sub> receptors and the  $\beta_1$ AR\_6mut,  $\beta_2$ AR\_6mut mutants. b. The association rate, dissociation rate and K<sub>d</sub> values of epinephrine to the  $\beta_1$ AR, the  $\beta_2$ AR and the chimeric  $\beta_1$ AR<sub>in</sub>/ $\beta_1$ AR<sub>out</sub>,  $\beta_1$ AR<sub>in</sub>/ $\beta_1$ AR<sub>out</sub> receptors.
