# Supplementary material
Source: PubMed Central journal article supplement (PMC8089101)
Supplement: 41422_2020_424_MOESM18_ESM.pdf [file 41422_2020_424_MOESM18_ESM.pdf]

**Supplementary Table 2 Data collection and refinement statistics (molecular replacement)**

|                                                      | T4L- $\beta$ 1AR/ Carazolol | T4L- $\beta$ 1AR/ Nb6B9/<br>BI-167107 | T4L- $\beta$ 1AR/ Nb6B/<br>Norepinephrine | T4L- $\beta$ 1AR/ Nb6B9/<br>Epinephrine |
|------------------------------------------------------|-----------------------------|---------------------------------------|-------------------------------------------|-----------------------------------------|
| <b>Data collection</b>                               |                             |                                       |                                           |                                         |
| Space group                                          | P1                          | C121                                  | C121                                      | C121                                    |
| Cell dimensions                                      |                             |                                       |                                           |                                         |
| <i>a</i> , <i>b</i> , <i>c</i> (Å)                   | 52.1, 52.8, 142.8           | 378.0, 66.2, 47.9                     | 376.8, 66.0, 47.8                         | 378.0, 66.2, 47.9                       |
| $\alpha$ , $\beta$ , $\gamma$ (°)                    | 92.1, 90.7, 116.7           | 90.0, 93.9, 90.0                      | 90.0, 93.5, 90.0                          | 90.0, 93.9, 90.0                        |
| Resolution (Å)                                       | 50 - 2.5 (2.6 -2.5)         | 50 - 2.6 (2.7-2.6)                    | 50 - 2.7 (2.8-2.7)                        | 50- 3.13 (3.244 - 3.132)                |
| <i>R</i> <sub>sym</sub> or <i>R</i> <sub>merge</sub> | 0.384 (1.446)               | 0.327 (0.951)                         | 0.404 (1.428)                             | 0.345 (1.339)                           |
| <i>I</i> / $\sigma$ <i>I</i>                         | 9.18 (1.44)                 | 4.66 (0.90)                           | 10.32 (0.99)                              | 5.59 (1.37)                             |
| Completeness (%)                                     | 100 (87.6)                  | 96.7 (85.0)                           | 100 (99.9)                                | 96.8 (58.3)                             |
| Redundancy                                           | 33.3 (7.0)                  | 6.64 (2.33)                           | 41.6 (9.16)                               | 11.4 (7.6)                              |
| CC1/2(%)                                             | 99.7 (48.2)                 | 99.1 (45.1)                           | 99.5 (51.8)                               | 98.2 (50.6)                             |
| <b>Refinement</b>                                    |                             |                                       |                                           |                                         |
| Resolution (Å)                                       | 20-2.5                      | 20-2.6                                | 20-2.7                                    | 20-3.1                                  |
| No. reflections (test set)                           | 46851 (2418)                | 35258 (1994)                          | 32439 (1989)                              | 20331 (1746)                            |
| <i>R</i> <sub>work</sub> / <i>R</i> <sub>free</sub>  | 0.2267 /0.2637              | 0.247/0.275                           | 0.235/0.262                               | 0.239/0.245                             |
| No. atoms                                            |                             |                                       |                                           |                                         |
| Protein                                              | 7012                        | 4463                                  | 4433                                      | 4424                                    |
| Ligand                                               | 44                          | 27                                    | 12                                        | 13                                      |
| Others (Lipids, ions, water)                         | 321                         | 179                                   | 133                                       | 89                                      |
| <i>B</i> -factors (Å <sup>2</sup> )                  |                             |                                       |                                           |                                         |
| Receptor                                             | 90.29                       | 86.02                                 | 70.41                                     | 81.32                                   |
| T4L                                                  | 44.66                       | 55.83                                 | 41.99                                     | 53.00                                   |
| Nb 6B9                                               | no                          | 117.79                                | 105.49                                    | 118.61                                  |
| Ligand                                               | 87.64                       | 78.44                                 | 51.99                                     | 66.38                                   |
| Others (Lipids, ions, water)                         | 62.75                       | 83.14                                 | 73.56                                     | 89.89                                   |
| R.m.s. deviations                                    |                             |                                       |                                           |                                         |
| Bond lengths (Å)                                     | 0.006                       | 0.008                                 | 0.004                                     | 0.005                                   |
| Bond angles (°)                                      | 0.72                        | 1.04                                  | 0.70                                      | 0.63                                    |
| Ramachandran statistics                              |                             |                                       |                                           |                                         |
| Favored regions (%)                                  | 97.67                       | 98.75                                 | 98.76                                     | 98.93                                   |
| Allowed regions (%)                                  | 2.33                        | 1.25                                  | 1.24                                      | 1.07                                    |
| Outliers (%)                                         | 0.00                        | 0.00                                  | 0.00                                      | 0.00                                    |

\*Values in parentheses are for highest-resolution shell.

### Supplementary information, Table. S2| Data collection and refinement statistics (molecular replacement)

The data collection and refinement statistics of T4L- $\beta$ <sub>1</sub>AR/carazolol, T4L- $\beta$ <sub>1</sub>AR/BI-167107/Nb6B9,

T4L- $\beta$ <sub>1</sub>AR/norepinephrine/Nb6B9 and T4L- $\beta$ <sub>1</sub>AR/epinephrine/Nb6B9.
